# Supplementary material for: Co-catalysis over a tri-functional ligand modified Pd-catalyst for hydroxycarbonylation of terminal alkynes towards α,β-unsaturated carboxylic acids
Source: Royal Society of Chemistry journal article supplement (doi:10.1039/c9gc01887e), 2019-01-01

## **Supplementary Information**

### **1. Characterization**

#### **1.1 FT-IR spectral characterization**

#### **1.2 $^1\text{H}/^{31}\text{P}$ NMR data for Pd-L1**

#### **1.3 $^1\text{H}/^{13}\text{C}$ NMR data for the products of hydroxycarbonylation of phenylacetylene derivatives**

## 1.1 FT-IR spectral characterization

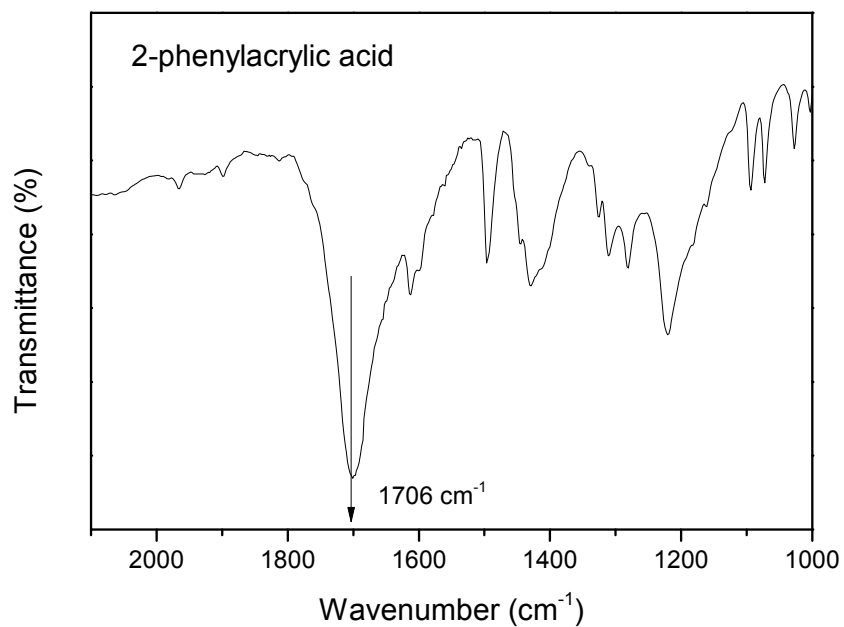

**S. Fig. 1** The FT-IR spectra of 2-phenylacrylic acid recorded at room temperature in air atmosphere (KBr pellet)

## 1.2 $^1\text{H}/^{31}\text{P}$ NMR data for Pd-L1

**Pd-L1:**  $^1\text{H}$  NMR (500 MHz,  $\text{CD}_3\text{OD}$ ):  $\delta$  = 8.15 (d,  $J$  = 10 Hz, 2H,  $2\text{P}^+\text{Ph}_2\text{CCH}$ ), 7.80-7.82 (m, 4H, phenyl), 7.72-7.76 (m, 8H, phenyl), 7.64-7.68 (m, 10H, phenyl), 7.31-7.40 (m, 14H, phenyl), 7.12 (t,  $J$  = 10 Hz, 2H, phenyl), 6.93 (t,  $J$  = 10 Hz, 10H, phenyl), 6.55-6.58 (m, 2H, phenyl), 3.70-3.77 (m, 4H,  $2\text{P}^+\text{CH}_2$ ), 2.43-2.46 (m, 4H,  $2\text{CH}_2\text{SO}_3^-$ ), 2.02-2.10 (m, 4H,  $2\text{CH}_2\text{CH}_2\text{CH}_2$ ), 1.77 (s, 12H,  $4\text{CH}_3$ ).  $^{31}\text{P}$  NMR (202 MHz,  $\text{CD}_3\text{OD}$ ):  $\delta$  = 26.60 (s,  $\text{P}^+\text{Ph}_2$ ), 28.59 (s,  $\text{PdPPh}_2$ ).

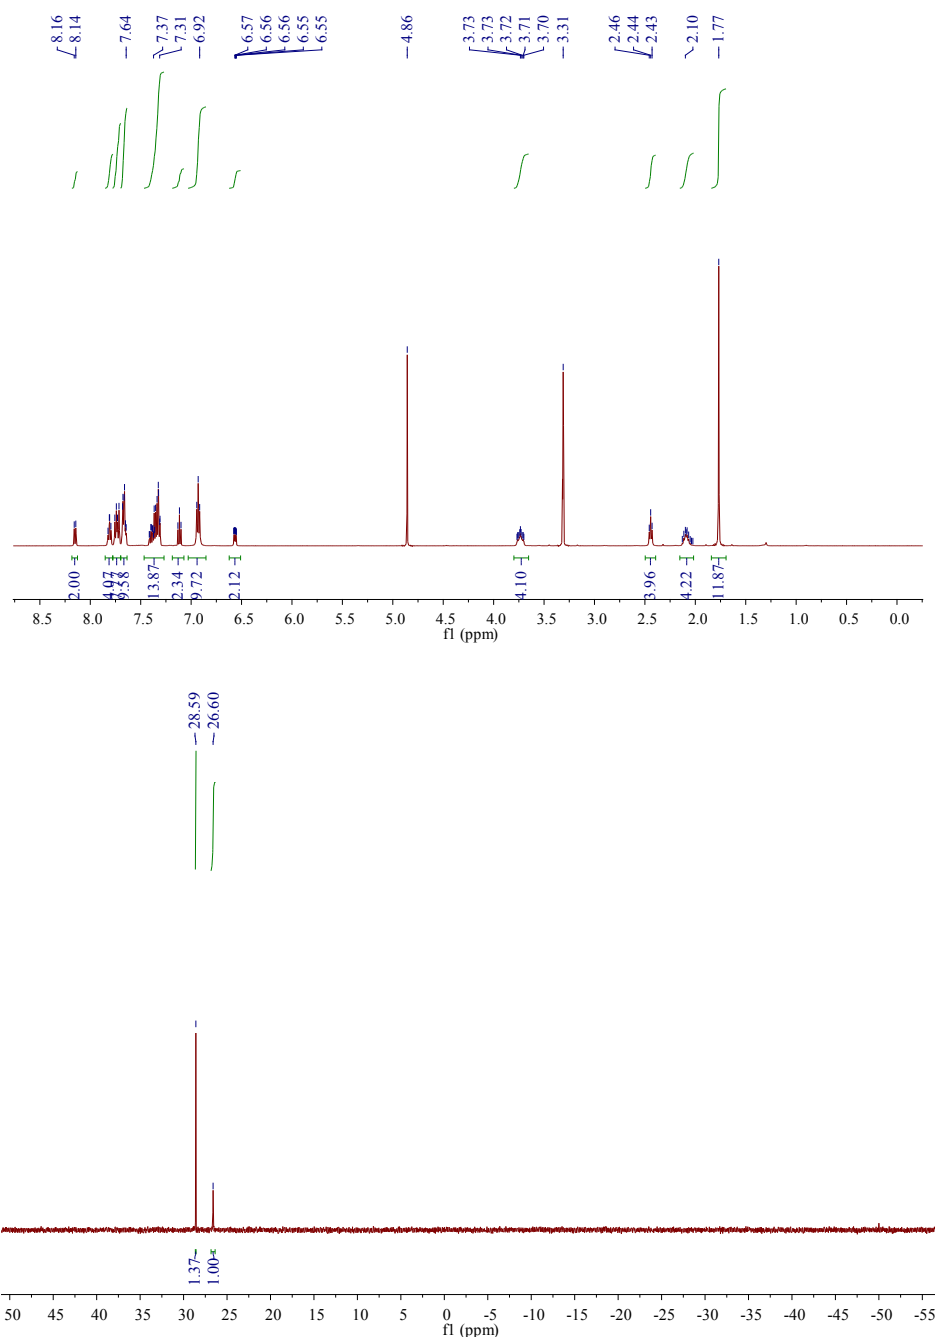

### 1.3 <sup>1</sup>H/<sup>13</sup>C NMR data and spectra for the products of alkoxyacylation of the phenylacetylene derivatives listed in Table 3

#### 2-phenylacrylic acid (Entry 1)

<sup>1</sup>H NMR (400 M, CDCl<sub>3</sub>):  $\delta$  = 7.43-7.47 (m, 2H, C<sub>6</sub>H<sub>5</sub>), 7.35-7.41 (m, 3H, C<sub>6</sub>H<sub>5</sub>), 6.56 (s, 1H, CCH<sub>2</sub>), 6.04 (s, 1H, CCH<sub>2</sub>).

<sup>13</sup>C NMR (100 M, CDCl<sub>3</sub>):  $\delta$  = 172.22, 140.78, 136.25, 129.55, 128.59, 128.50, 128.28.

#### 2-(*p*-tolyl)acrylic acid (Entry 2)

<sup>1</sup>H NMR (400 M, CDCl<sub>3</sub>):  $\delta$  = 7.32-7.34 (m, 2H, C<sub>6</sub>H<sub>4</sub>), 7.17-7.18 (m, 2H, C<sub>6</sub>H<sub>4</sub>), 6.48 (s, 1H, CCH<sub>2</sub>), 5.98 (s, 1H, CCH<sub>2</sub>), 2.36 (s, 3H, CH<sub>3</sub>).

<sup>13</sup>C NMR (100 M, CDCl<sub>3</sub>):  $\delta$  = 171.74, 140.60, 138.43, 133.43, 129.52, 129.01, 128.65, 128.46, 126.99, 21.34.

#### 2-(*m*-tolyl)acrylic acid (Entry 3)

<sup>1</sup>H NMR (400 M, CDCl<sub>3</sub>):  $\delta$  = 7.24-7.33 (m, 3H, C<sub>6</sub>H<sub>4</sub>), 7.17-7.19 (m, 1H, C<sub>6</sub>H<sub>4</sub>), 6.53 (s, 1H, CCH<sub>2</sub>), 6.01 (s, 1H, CCH<sub>2</sub>), 2.39 (s, 3H, CH<sub>3</sub>).

#### (*E*)-3-(*m*-tolyl)acrylic acid (Entry 3)

<sup>1</sup>H NMR (400 M, CDCl<sub>3</sub>):  $\delta$  = 7.78 (d, *J* = 16.0 Hz, 1H, PhCH), 6.45 (d, *J* = 16.0 Hz, 1H, CHCOOH).

#### 2-(*o*-tolyl)acrylic acid (Entry 4)

<sup>1</sup>H NMR (400 M, CDCl<sub>3</sub>):  $\delta$  = 7.13-7.25 (m, 4H, C<sub>6</sub>H<sub>4</sub>), 6.64 (s, 1H, CCH<sub>2</sub>), 5.84 (s, 1H, CCH<sub>2</sub>), 2.24 (s, 3H, CH<sub>3</sub>).

<sup>13</sup>C NMR (100 M, CDCl<sub>3</sub>):  $\delta$  = 171.97, 141.31, 136.63, 136.34, 130.95, 130.07, 129.68, 128.52, 125.82, 20.00.

#### 2-(4-(*tert*-butyl)phenyl)acrylic acid (Entry 5)

<sup>1</sup>H NMR (400 M, CDCl<sub>3</sub>):  $\delta$  = 7.36-7.42 (m, 4H, C<sub>6</sub>H<sub>4</sub>), 6.51 (s, 1H, CCH<sub>2</sub>), 6.02 (s, 1H, CCH<sub>2</sub>), 1.34 (s, 9H, C(CH<sub>3</sub>)<sub>3</sub>).

<sup>13</sup>C NMR (100 M, CDCl<sub>3</sub>):  $\delta$  = 172.21, 151.58, 140.53, 133.33, 128.83, 128.42, 128.26, 126.10, 125.27, 34.76, 31.43, 31.29, 31.24.

#### 2-(4-methoxyphenyl)acrylic acid (Entry 6)

<sup>1</sup>H NMR (400 M, CDCl<sub>3</sub>):  $\delta$  = 7.39-7.41 (m, 2H, C<sub>6</sub>H<sub>4</sub>), 6.90-6.92 (m, 2H, C<sub>6</sub>H<sub>4</sub>), 6.46 (s, 1H, CCH<sub>2</sub>), 5.96 (s, 1H, CCH<sub>2</sub>), 3.83 (s, 3H, OCH<sub>3</sub>).

#### (*E*)-3-(4-methoxyphenyl)acrylic acid (Entry 6)

$^1\text{H}$  NMR (400 M,  $\text{CDCl}_3$ ):  $\delta = 7.76$  (d,  $J = 16.0$  Hz, 1H, PhCH), 6.33 (d,  $J = 16.0$  Hz, 1H, CHCOOH).

**2-(4-fluorophenyl)acrylic acid** (Entry 7)

$^1\text{H}$  NMR (400 M,  $\text{CDCl}_3$ ):  $\delta = 7.40$ -7.44 (m, 2H,  $\text{C}_6\text{H}_4$ ), 7.03-7.07 (m, 2H,  $\text{C}_6\text{H}_4$ ), 6.54 (s, 1H, CCH<sub>2</sub>), 6.00 (s, 1H, CCH<sub>2</sub>).

$^{13}\text{C}$  NMR (100 M,  $\text{CDCl}_3$ ):  $\delta = 172.06$ , 164.20, 161.74, 139.72, 130.46, 130.38, 129.66, 115.36, 115.14.

**2-(4-chlorophenyl)acrylic acid** (Entry 8)

$^1\text{H}$  NMR (400 M,  $\text{CDCl}_3$ ):  $\delta = 7.33$ -7.39 (m, 4H,  $\text{C}_6\text{H}_4$ ), 6.56 (s, 1H, CCH<sub>2</sub>), 6.03 (s, 1H, CCH<sub>2</sub>).

$^{13}\text{C}$  NMR (100 M,  $\text{CDCl}_3$ ):  $\delta = 171.50$ , 139.66, 134.63, 129.98, 129.95, 129.68, 129.44, 128.51, 117.82.

**2-(4-bromophenyl)acrylic acid** (Entry 9)

$^1\text{H}$  NMR (400 M,  $\text{CDCl}_3$ ):  $\delta = 7.49$ -7.51 (m, 2H,  $\text{C}_6\text{H}_4$ ), 7.31-7.33 (m, 2H,  $\text{C}_6\text{H}_4$ ), 6.57 (s, 1H, CCH<sub>2</sub>), 6.04 (s, 1H, CCH<sub>2</sub>).

$^{13}\text{C}$  NMR (100 M,  $\text{CDCl}_3$ ):  $\delta = 171.60$ , 139.71, 135.08, 131.47, 130.25, 130.08, 122.84.

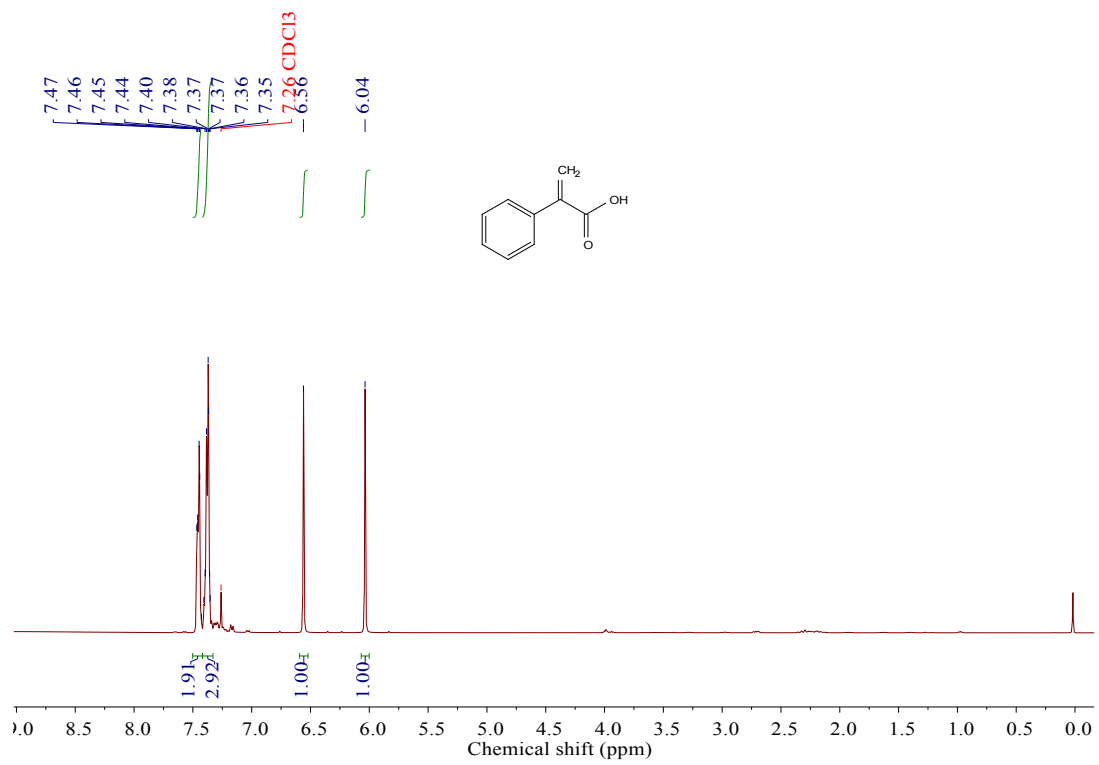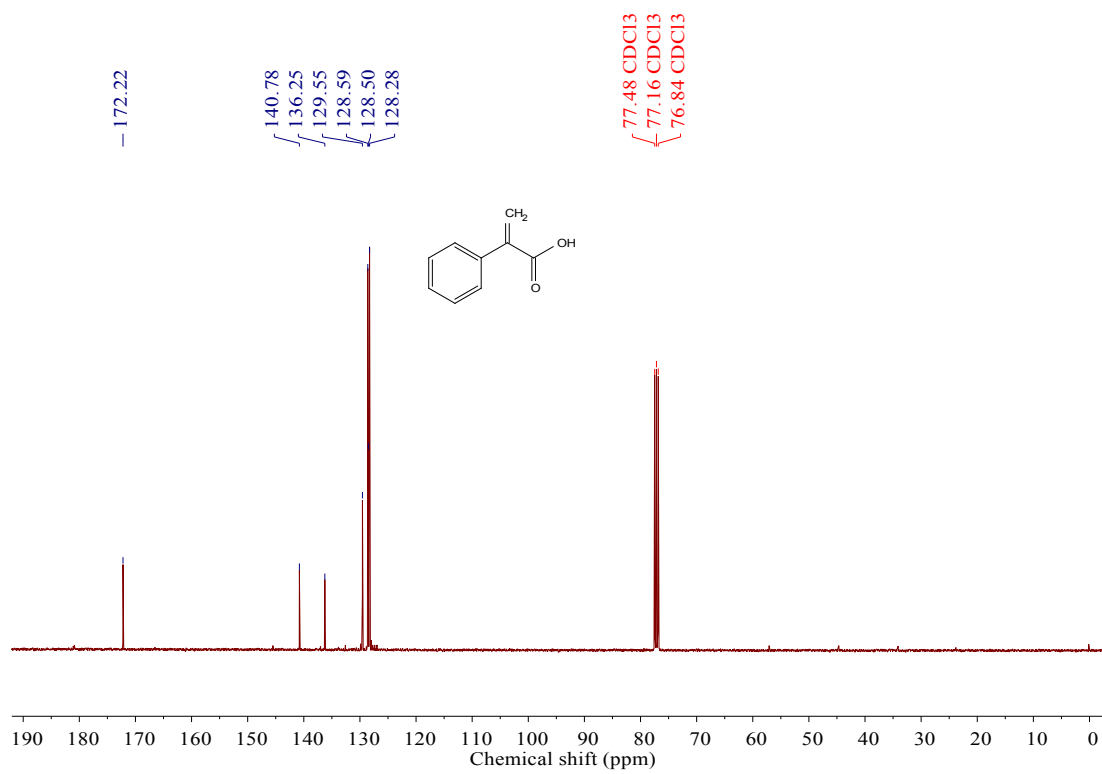

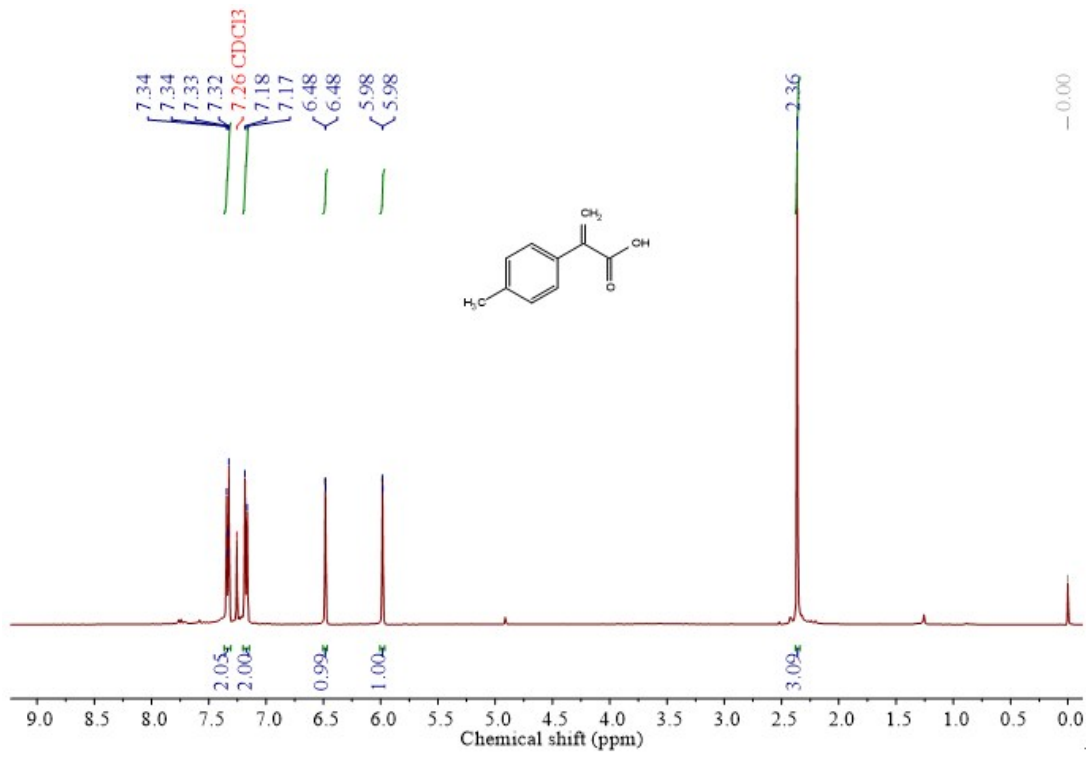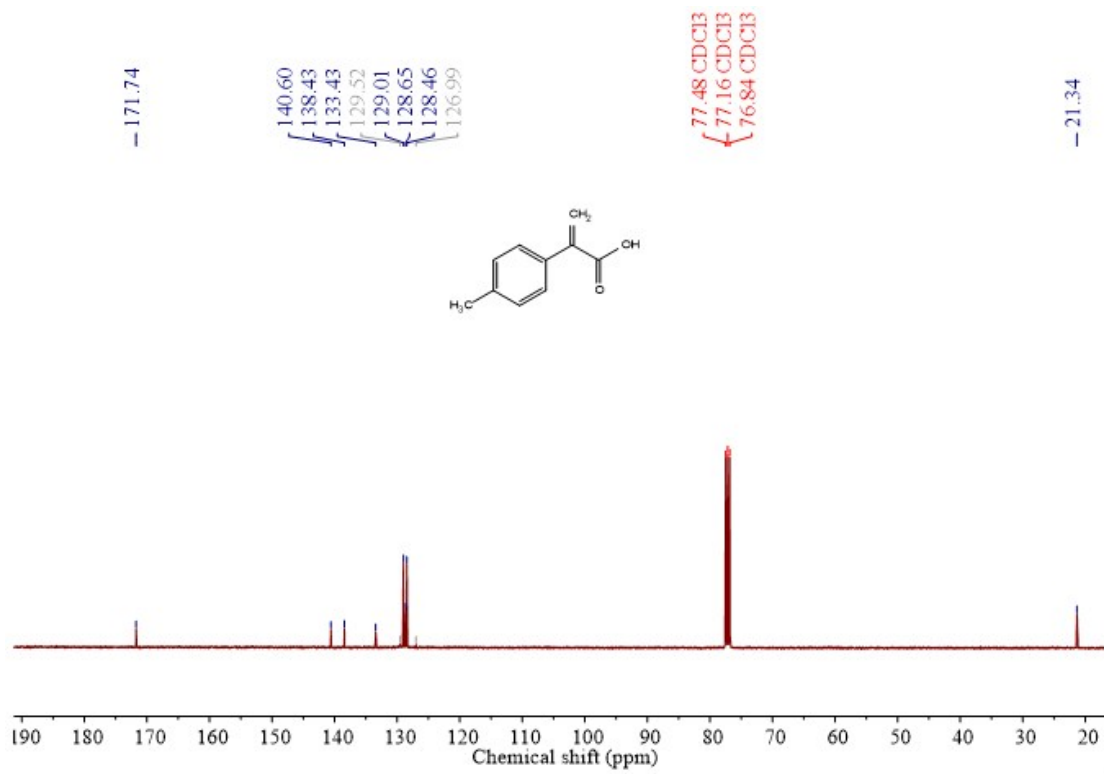

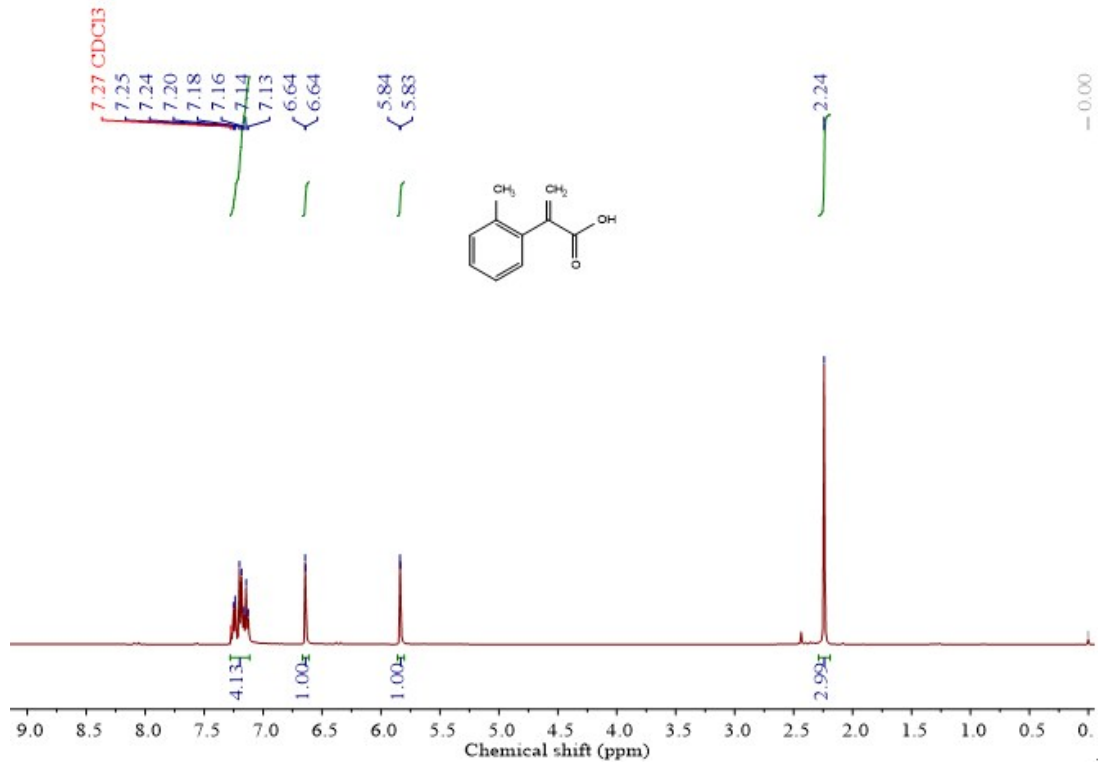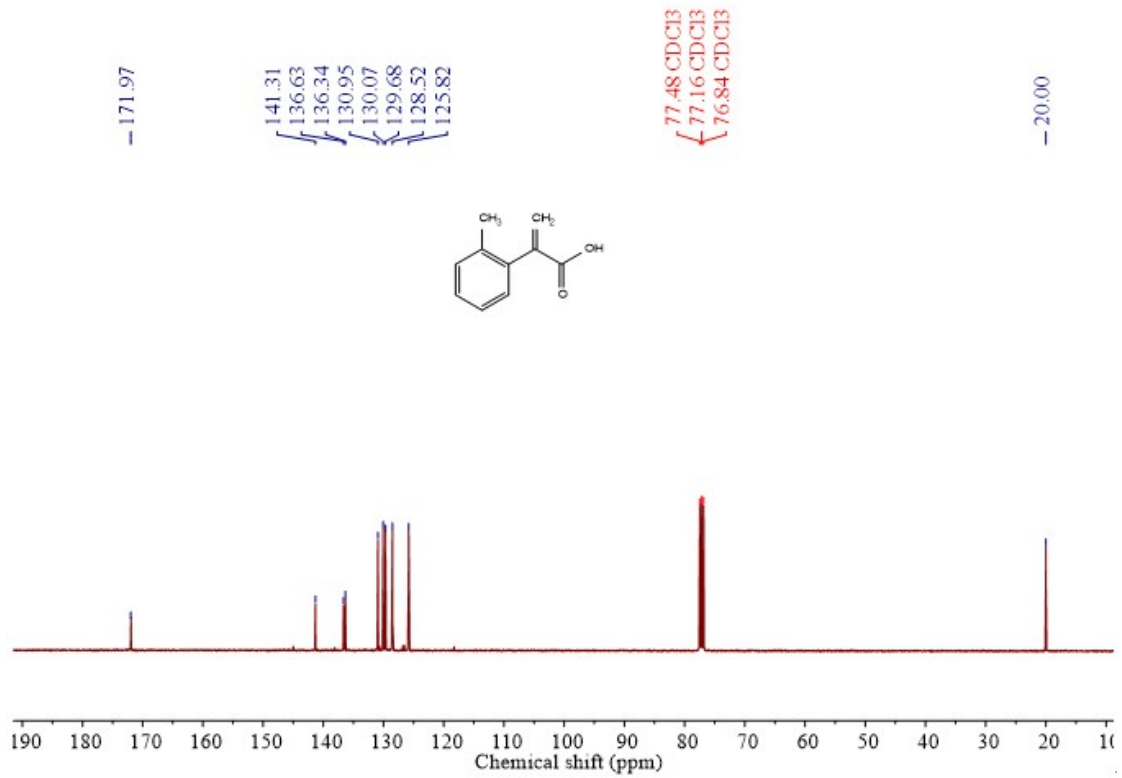



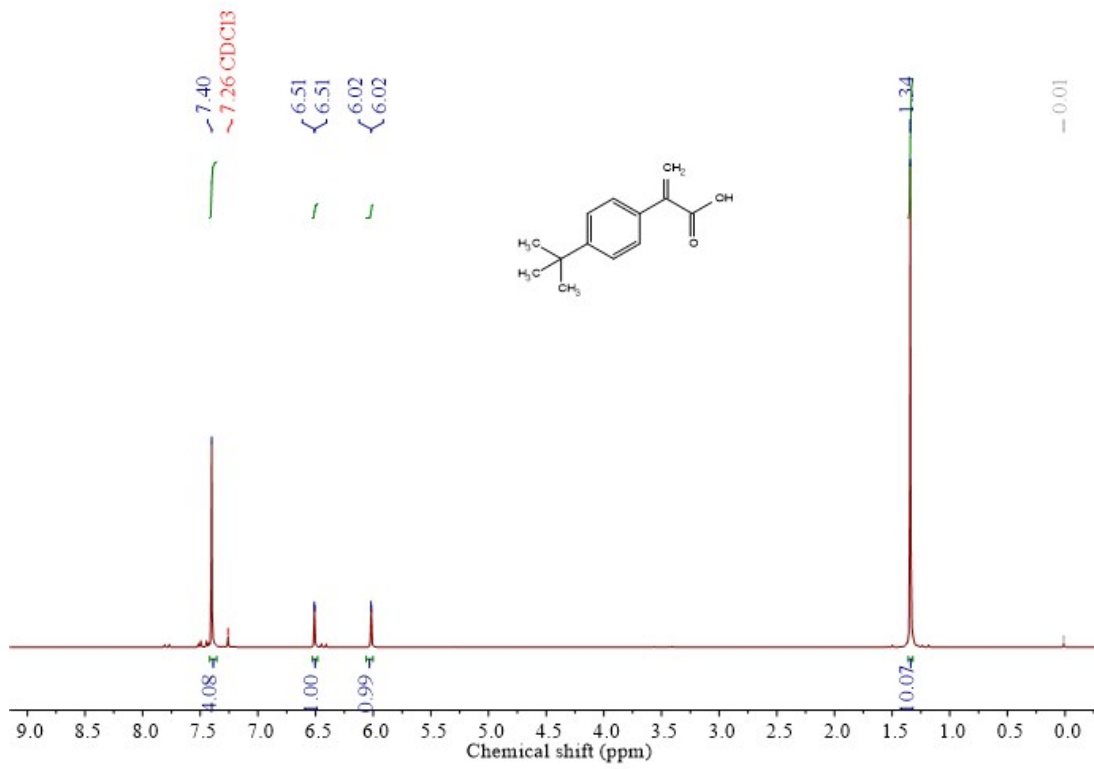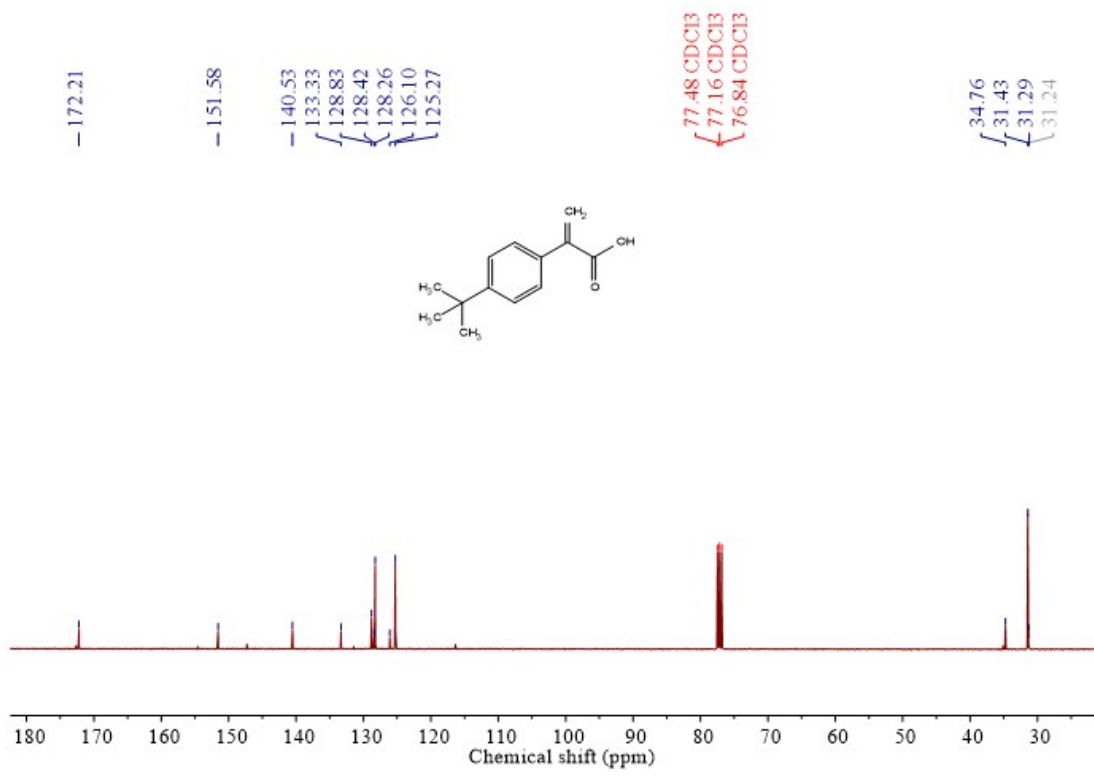

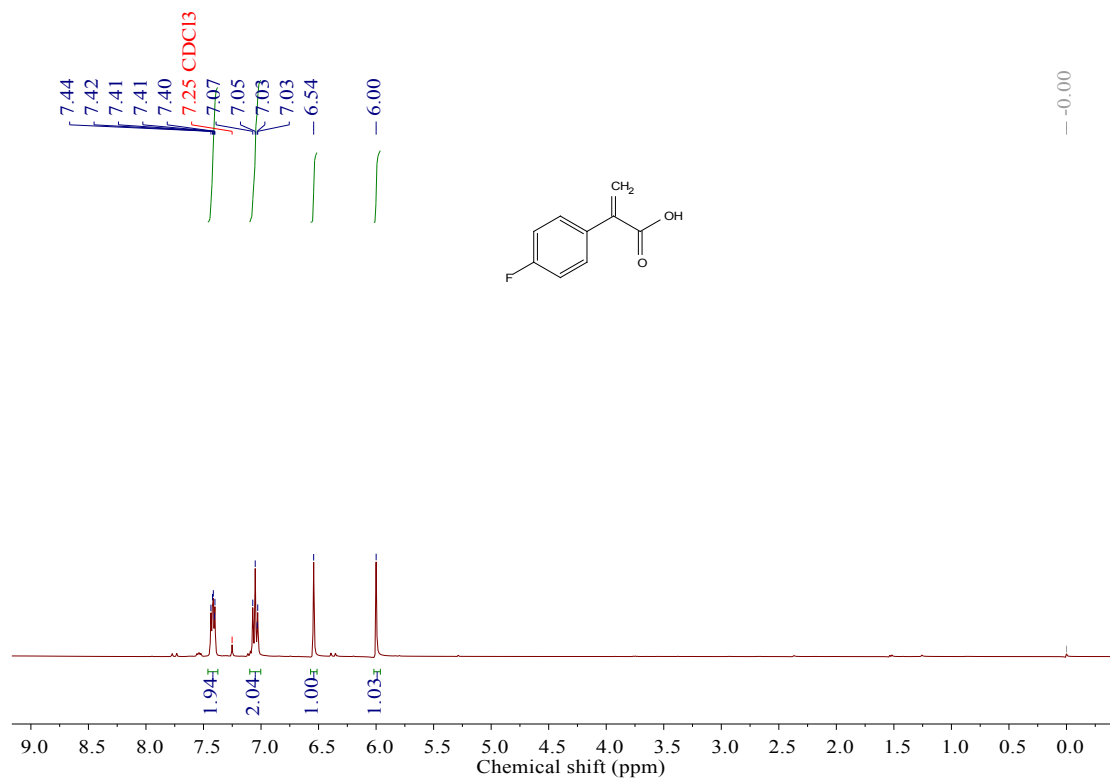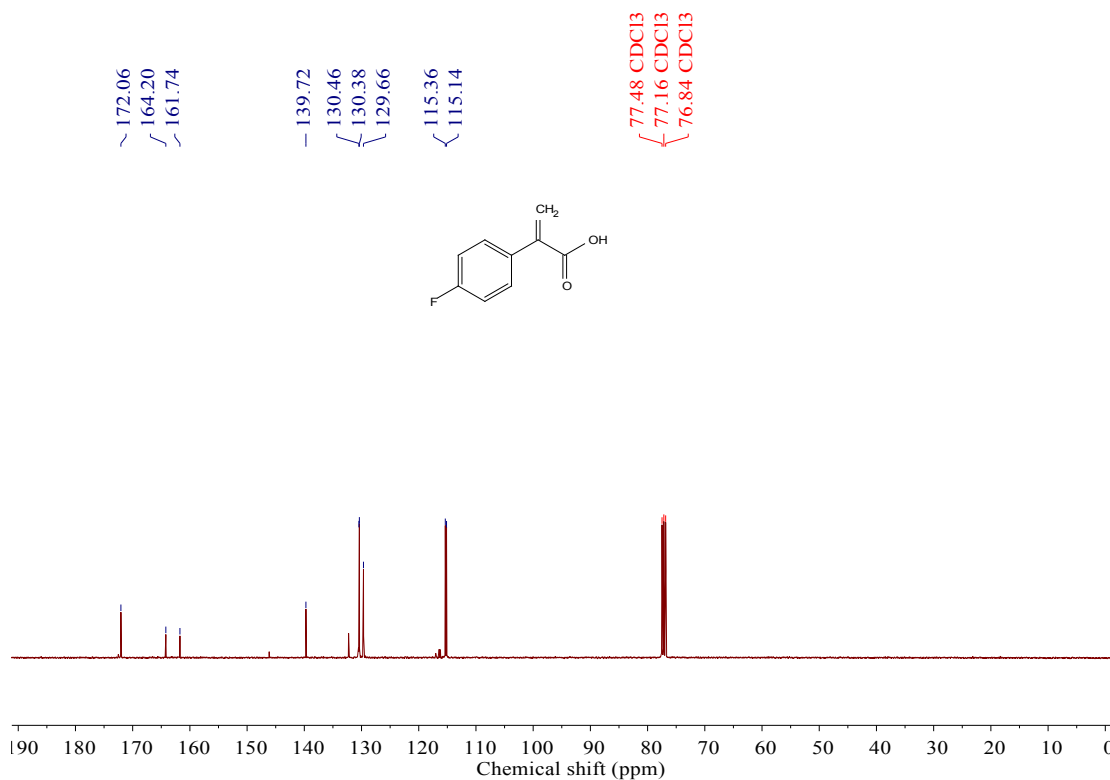

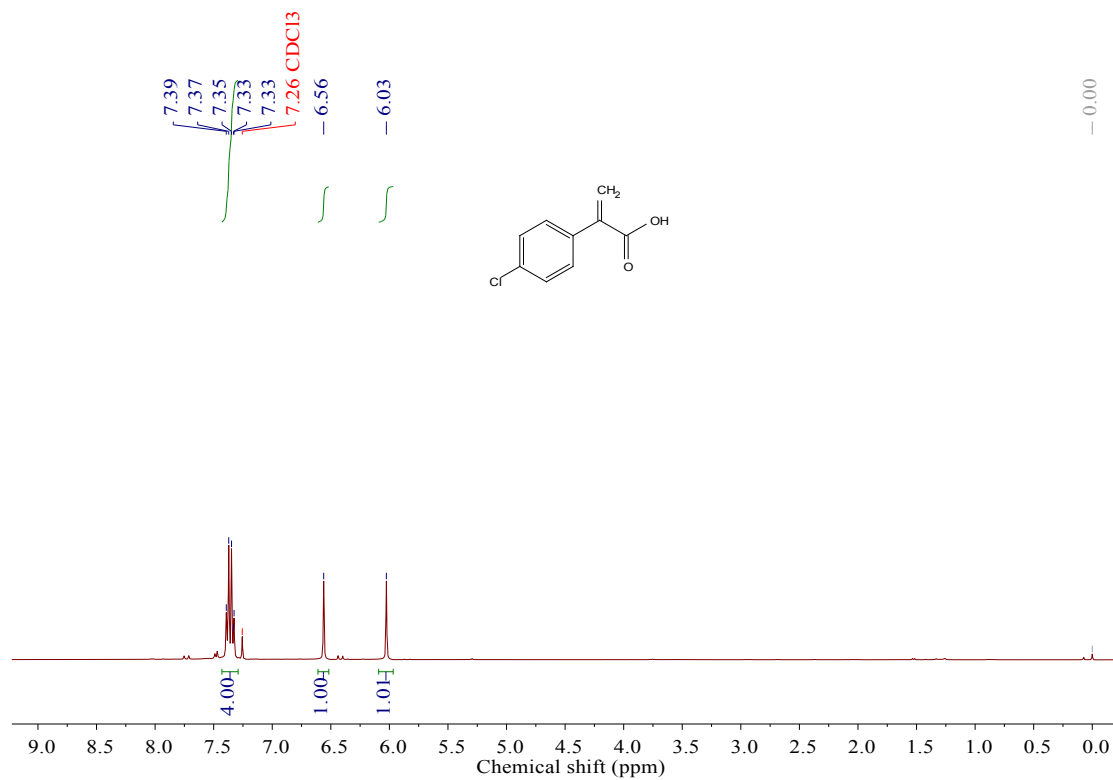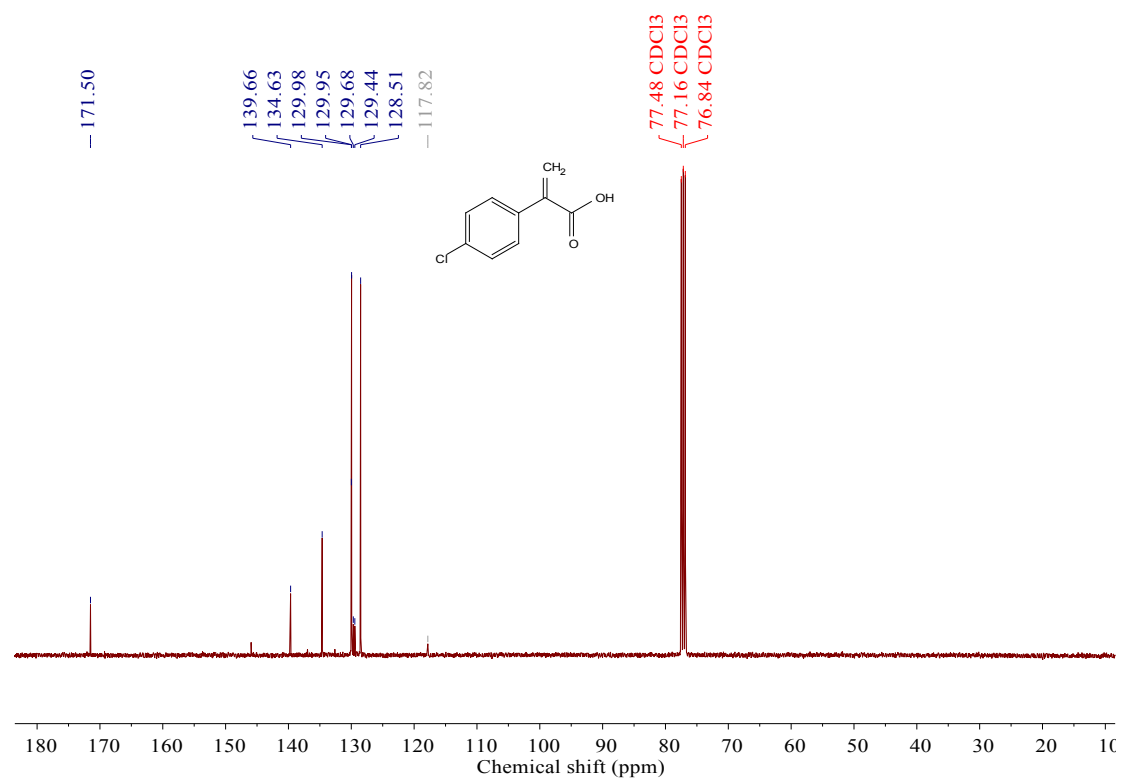

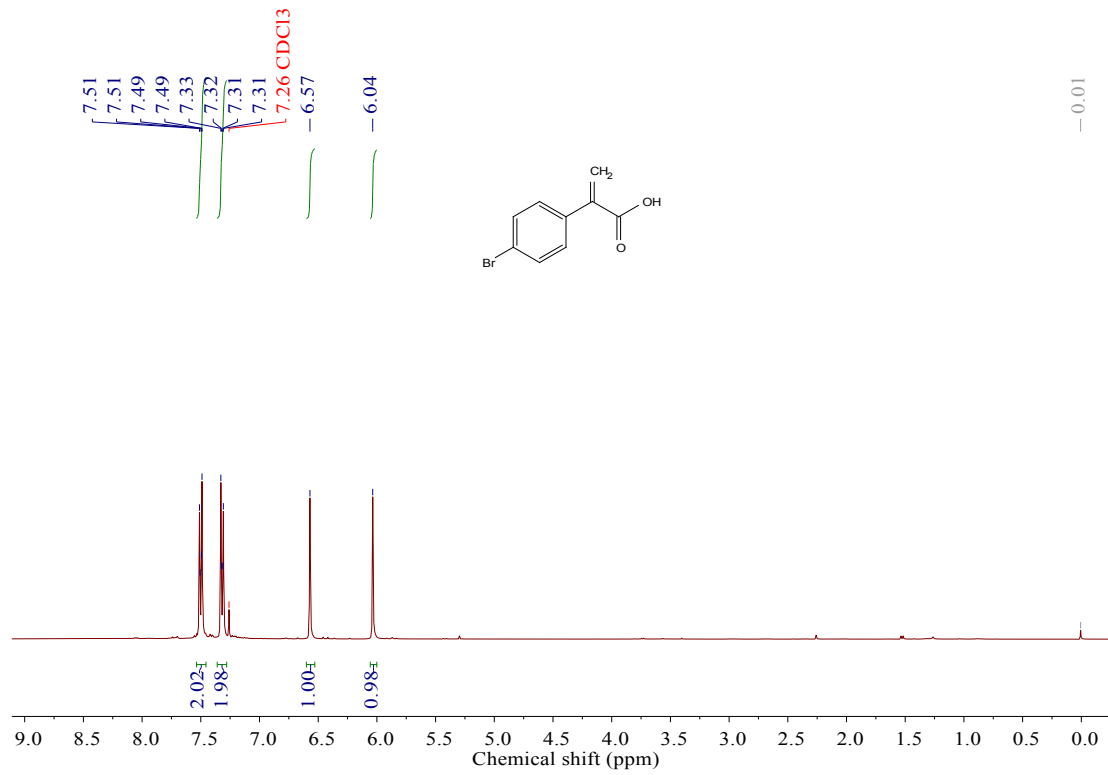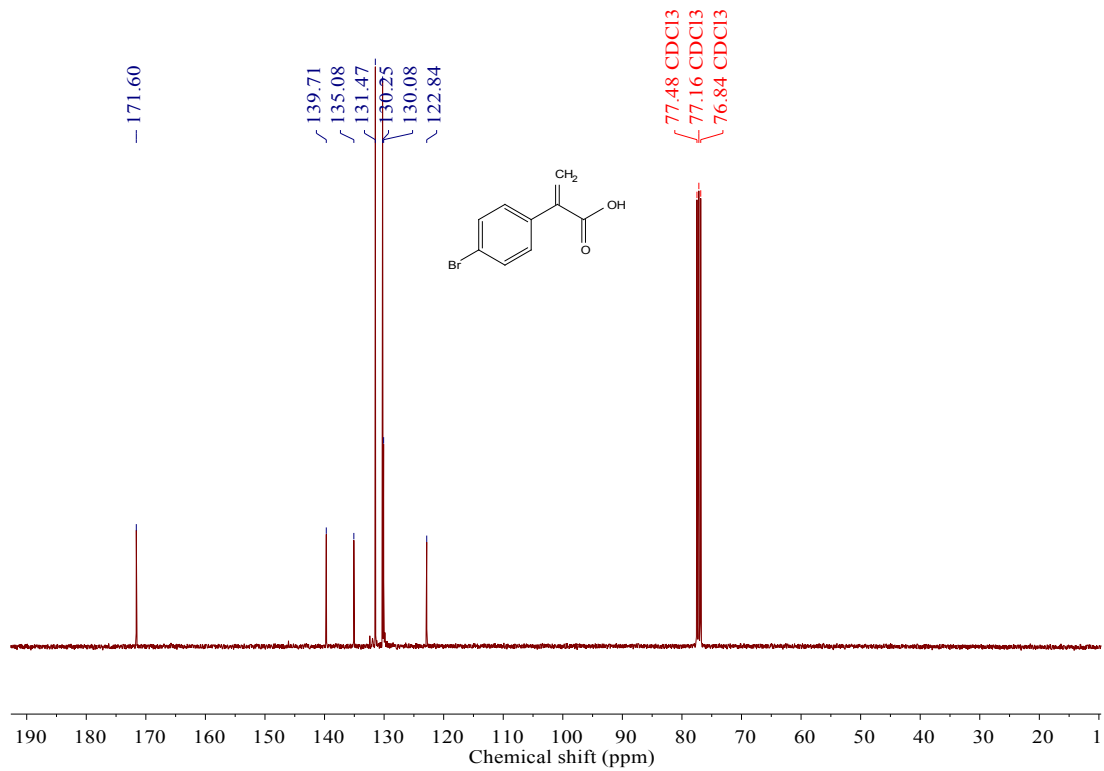

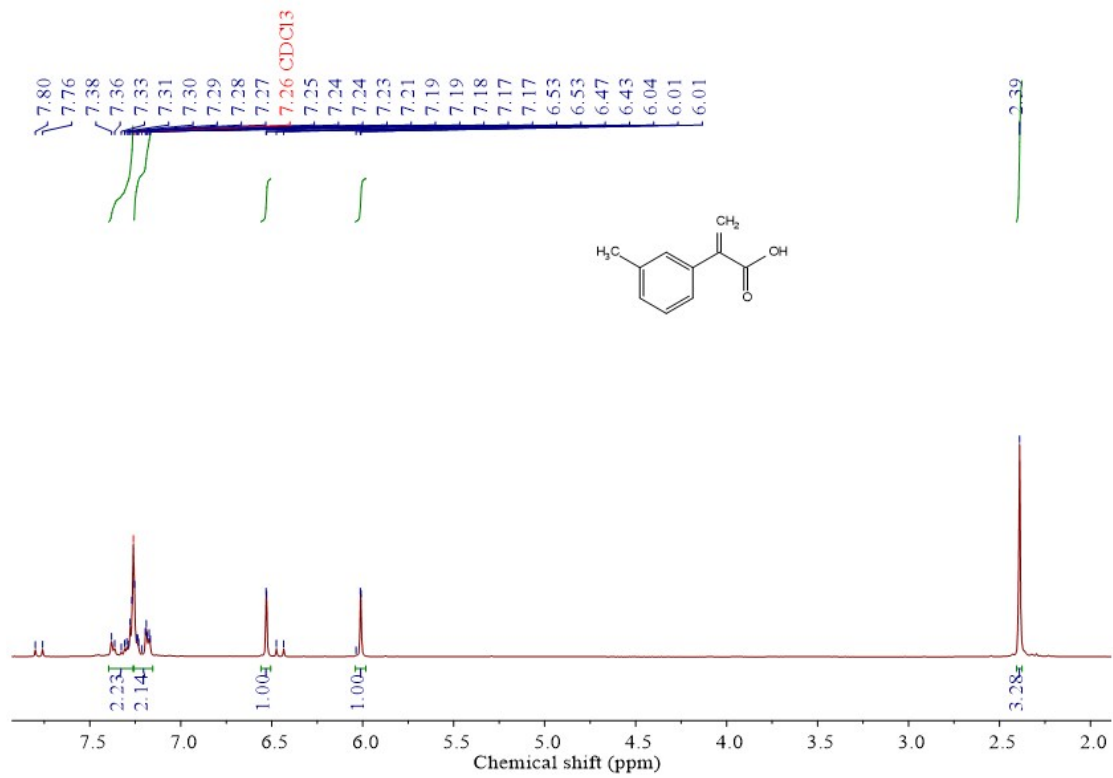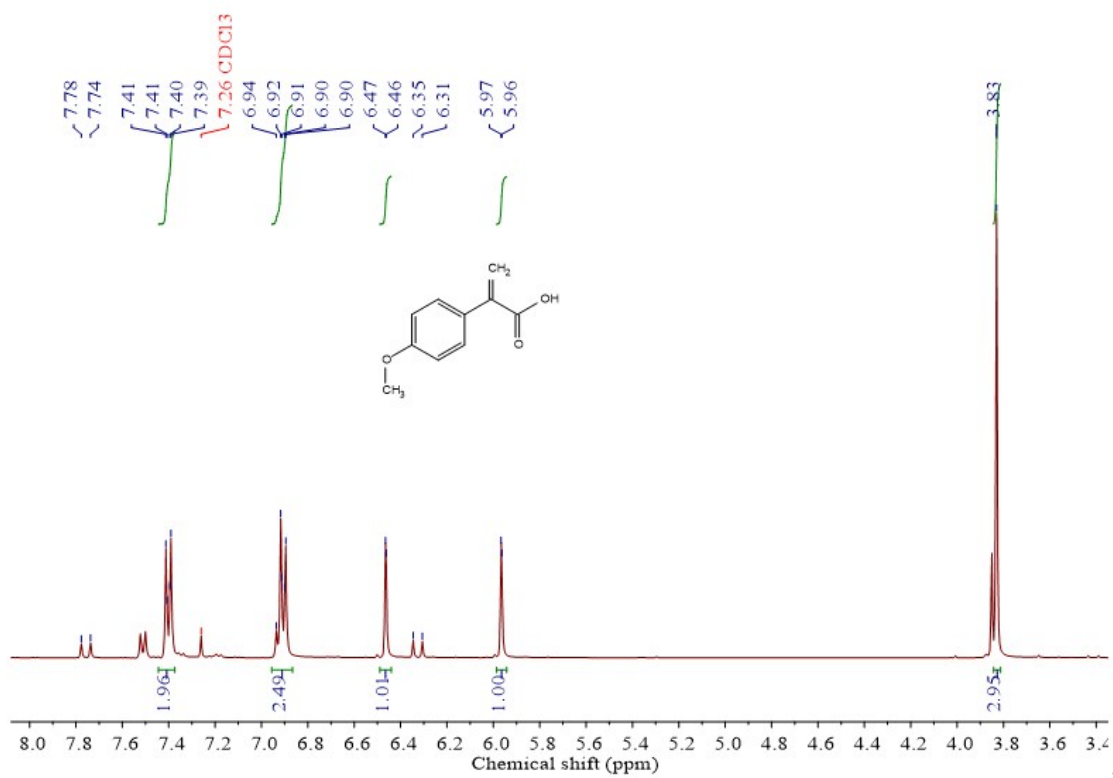

Supplement: c9gc01887e1.pdf [file c9gc01887e1.pdf]
